# Supplementary material
Source: publisher figshare collection journal article supplement (https://karger.figshare.com/ndownloader/files/28985178)
Supplement: Supplementary file 1 [file 28985178]

**Supplementary Table**

**Table 1**: Information on index case. An index case as source of infection was stated in 89 (64.0%) children, where parents accounted for the highest proportion, followed by other persons in the same household and grandparents.

| **Household category** | **Details of setting index case** | **Number (proportion %)**  **Total n = 89** |
| --- | --- | --- |
|  |  |
| Same household | parents | 32 (36.0%) |
| other persons in the same household | 20 (22.5%) |
| grandparents | 14 (15.7%) |
| siblings | 6 (6.7%) |
| Outside the family or household | asylum seeking center | 8 (9.0%) |
| school | 7 (7.9%) |
| in another household | 2 (2.2%) |

**Supplementary Figure**

**Figure 1:** Prescribed drug dosages for children <30kg. Boxplot with tukey whiskers and jittered dot plot. The median dose (only calculated for children < 30 kg) for each of the anti-tuberculous medications was: 11 (IQR 10 to 13) mg/kg for isoniazid, 15 (IQR 12.5 to 16.9) mg/kg for rifampicin, 33 (IQR 27.8 to 35.0) mg/kg for pyrazinamide and 20 (IQR 19.8 to 22.9) mg/kg for ethambutol. The range of drug dosages prescribed was highly correlating whit the national guidelines, indicated with bars in the figure. Information about prescription of fixed-dose combination was available for 86 children and prescribed in 43 (50%) children. Median age and weight of children with fixed-dose combinations was higher compared to those receiving single drugs with 13.4 (IQR 6.3 to 15.0) years compared to 3.1 (IQR 1.7 to 7.1) years, p-value <0.00001) and 41.0 (IQR 21.5 to 36.7) kg compared to 15.1 (IQR 12.1 to 19.8) kg (p-value <0.00001).

**
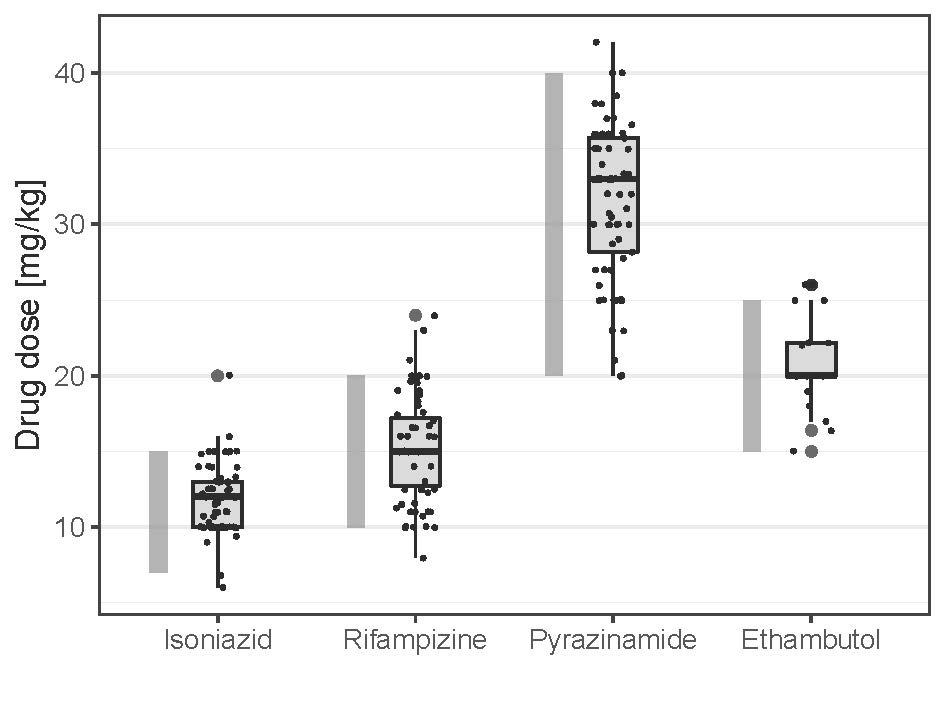
**


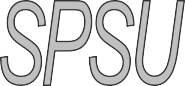
Erfassung von seltenen pädiatrischen Erkrankungen bei in Spitälern behandelten Kindern

**Initialen des Patienten :** ..

**Code Klinik:** -

**Studie SPSU**

**Swiss Paediatric Surveillance Unit**

Recherche de maladies pédiatriques rares chez les enfants traités en milieu hospitalier

Trägerschaft: Schweizerische Gesellschaft für Pädiatrie (SGP) und Bundesamt für Gesundheit (BAG)

**Fragebogen für Patienten mit aktiver Tuberkulose**

1. **Basisdaten**

Geburtsdatum:  /  /  (TT/MM/JJJJ) Geschlecht : Weiblich  (1) Männlich  (0)

Gewicht : . (kg) Länge: .(cm) Geburtsland : ……………………………………

Wenn nicht in der Schweiz geboren: seit wann in der Schweiz?  (Monat)

Geburtsland Mutter : ..…………………….…... Geburtsland Vater: …………………………..

BCG Impfung: Impfnarbe ………………..  (0)

Erhalten (schriftlich dokumentiert) …………….

- - (1)

Datum :  /  /  (TT/MM/JJJJ)

Nicht gemacht…………...  (2)

Unklar  (3)

HIV Testung: Gemacht…………………..  (1) Datum :  /  /  (TT/MM/JJJJ)

Ergebnisse: Negativ  (0) Positiv  (1)

Form der Tuberkulose:

Nicht gemacht…  (2)

Unklar  (3)

Ursache der Abklärung :

| Lungen  (0) | Lymphknoten (LK) | - (2) | Miliare | - (4) |
| --- | --- | --- | --- | --- |
| Abdominal  (1) | Lungen/LK | - (3) |  |  |

Kontakt exposition

- (0) Symptome  (1) Kontakt/

Symptome/

- (2) Flüchtling  (3)

Symptome/ Flüchtling

- (4) Kontakt/ Flüchtling
  - (5)

Andere

- - - (6)

1. **Symptome (Mehrfachauswahl möglich)**

« Wheezing » (Giemen oder Pfeifen)

|  | Nein | Ja |
| --- | --- | --- |
| Keine Symptome | - (0) | - (1) |
| Husten | - (0) | - (1) ……….. |

- (0)  (1)

Wenn ja, bitte Dauer angeben:  (Tag)

Fieber > 38°C  (0)  (1) ……….. Wenn ja, bitte Dauer angeben :  (Tag)

Fehlende Gewichtszunahme

- (0)  (1)

Gewichtsverfust  (0)  (1)

Andere Symptome  (0)  (1) Wenn ja, bitte genauer bezeichnen :

…………………………………………

1. **Diagnostik durch Bildgebung (Mehrfachauswahl möglich)**

| Röntgen Thorax | gemacht  (1)  Ap/pa  (0) | nicht gemacht  (0)  Datum :  /  /  |
| --- | --- | --- |
|  | Seitlich  (1) | (TT/MM/JJJJ)  Datum :  /  /   (TT/MM/JJJJ) |
| Kompression Trachea/Bronchus | Nein   - (0) | Ja   - (1) |
| Hiläre Lymphadenopathie | - (0) | - (1) |
| Konsolidation Parenchym | - (0) | - (1) |
| Miliare Verschattung | - (0) | - (1) |
| Pleuraerguss | - (0) | - (1) |
| Kaverne | - (0) | - (1) |

nicht gemacht  (0) nicht gemacht  (0) nicht gemacht  (0) nicht gemacht  (0)

| CT Thorax | gemacht  (1) | Datum :  /  /  |
| --- | --- | --- |
| CT Schädel | gemacht  (1) | (TT/MM/JJJJ)  Datum :  /  /  |
| MRI cérébrale | gemacht  (1) | (TT/MM/JJJJ)  Datum :  /  /  |
| Sonographie | gemacht  (1) | (TT/MM/JJJJ)  Datum :  /  /  |
|  |  | (TT/MM/JJJJ) |
|  | Lokalisation : | ……………………………………. |
| Andere | gemacht  (1) | Datum :  /  /   (TT/MM/JJJJ) |
| Lokalisation :  **4. Immuno-diagnostik (Mehrfachauswa** | | ……………………………………..  **hl möglich)** |

nicht gemacht  (0)

Mantoux test Nein  (0) Ja  (1) Datum :  /  /  (TT/MM/JJJJ)

Resultat:  (mm)

T.SPOT-TB® Nein  (0) Ja  (1) Datum :  /  /  (TT/MM/JJJJ)

Resultat : Negativ  (0) Positiv  (1) Unklar  (2)

Nil . (Spots) ESAT-6 . (Spots) CFP-10 . (Spots) PHA . (Spots)

Interpretation: Negativ  (0)

Positiv  (1)

Nicht spezifiziert  (2)

QuantiFERON-TB Gold® Nein  (0) Ja  (1) Datum :  /  / 

(TT/MM/JJJJ)

Resultat: Negativ  (0) Positiv  (1) Unklar  (2)

Nil . (IU/ml) TB-Ag1 . (IU/ml) TB-Ag2 . (IU/ml) PHA . (IU/ml)

Interpretation: Negativ  (0)

Positiv  (1)

Nicht spezifiziert:  (2)

Andere Nein  (0) Ja  (1)

Wenn ja, bitte genauer bezeichnen :

………………………………

1. **Mikrobiologische Diagnostik (Mehrfachauswahl möglich)**

|  | gemacht | Nicht gemacht | Kultur positiv | Kultur negativ | PCR  positiv | PCR  Negativ |
| --- | --- | --- | --- | --- | --- | --- |
| Sputum | - (0) | - (1) | - (2) | - (3) | - (4) | - (5) |
| Magensaft | - (0) | - (1) | - (2) | - (3) | - (4) | - (5) |
| Broncho-alveoläre Lavage | - (0) | - (1) | - (2) | - (3) | - (4) | - (5) |
| Induziertes Sputum | - (0) | - (1) | - (2) | - (3) | - (4) | - (5) |
| Blutkultur | - (0) | - (1) | - (2) | - (3) | - (4) | - (5) |
| Lumbalpunktion | - (0) | - (1) | - (2) | - (3) | - (4) | - (5) |
| Biopsie (bitte Lokalisation angeben) | - (0)  (1)  (2)  (3) | | | | - (4) | - (5) |
| Lokalisation :  Punktat (bitte Lokalisation angeben) | ………………………………………   - (0)  (1)  (2)  (3) | | | | - (4) | - (5) |

Lokalisation : ……………………………………..

Mycobacterium Spezies: ……………………………………………………………………………………

1. **Resistenzprüfung und Therapie (Mehrfachauswahl möglich)**

**Resistenz Verabreicht Gesamtdosis**

|  | Nein | Ja | Unbekannt | Nein | Ja |
| --- | --- | --- | --- | --- | --- |
| Isoniazid | - (0) | - (1) | - (2) | - (0) | - (1) |
| Rifampicin | - (0) | - (1) | - (2) | - (0) | - (1) |
| Pyrazinamid | - (0) | - (1) | - (2) | - (0) | - (1) |
| Ethambutol | - (0) | - (1) | - (2) | - (0) | - (1) |
| Corticosteroid | ………………………………………… | | | - (0) | - (1) |

. (mg/kg/Tag)

. (mg/kg/Tag)

. (mg/kg/Tag)

. (mg/kg/Tag)

. (mg/kg/Tag)

Andere Therapie : ………………………………………………………………………………………………

1. **Vermutete Infektionsquelle**

| Vater  (0) Mutter  (1) | Unbekannt (2) | Vetter  (3) | Grossvater  (4) Grossmutter  (5) |
| --- | --- | --- | --- |
| Bruder  (6) Schwester (7) | Onkel  (8) | Schule (9) | Azylzentrum (10) Schöne Mutter (11) |
| Tante  (12) Kontact  (13) |  |  |  |

Andere  (14) Bitte ausführen : …………………………………………………………….

1. **Meldezentrum/Kontakt**

Spital: ……………………………

Name des Arztes: ………………………………………………………………

Telefon Nummer des Arztes :    

**Vielen Dank für Ihre wertvolle Mitarbeit!**

**Bitte senden Sie diesen Fragebogen an Dr. med. Nicole Ritz,**

**Universitäts-Kinderspital beider Basel (UKBB), Spitalstrasse 33, 4031 Basel.**

Falls nicht alle Informationen bekannt sind, bitte auch unvollständig ausgefüllte Fragebogen zurücksenden!


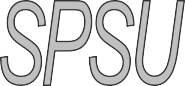
Recherche de maladies pédiatriques rares chez les enfants traités en milieu hospitalier

**Initiales du patient :** 

**Code clinique:** -

**Etude SPSU**

**Swiss Paediatric Surveillance Unit**

Erfassung von seltenen pädiatrischen Erkrankungen bei in Spitälern behandelten Kindern

Patronage: Société suisse de pédiatrie (SSP) et Office fédéral de la santé publique (OFSP)

**Questionnaire concernant les patients avec une tuberculose active**

1. **Données de base**

Date de naissance :  /  /  (JJ/MM/AAAA) Sexe : féminin  (1) masculin  (0)

Poids : . (kg) Taille : . (cm) Pays de naissance : ………………………………..

Si pas né en Suisse: depuis quand réside-t-il (-elle) en Suisse :  (mois)

Pays de naissance de la mère : .………………….. Pays de naissance du père:………………………..

Vaccination BCG:

| Cicatrice BCG …………….  Fait (Documentation écrite) | - (0) - (1) |
| --- | --- |
| Pas fait…………………….. | - (2) |
| Statut vaccinal incertain…. | - (3) |
| Fait ………………………… | - (1) |
| Pas fait…………………….. | - (2) |
| Incertain…………………… | - (3) |

Date :  /  /  (JJ/MM/AAAA)

Test HIV:

Type de tuberculose:

Date :  /  /  (JJ/MM/AAAA) Résultat: Négatif  (0) Positif  (1)

- - (4)

|  | |  | | |
| --- | --- | --- | --- | --- |
| Pulmonaire | - (0) | Ganglionnaire…………. | - (2) | Miliaire |
| Abdominale | - (1) | Pulmonaire/Ganglionnaire | - (3) |  |

Raison de l’enquête :

Contacts/ Exposition

- (0) Symptômes  (1) Contacts/

Symptômes

(2) Refugié (3)

Symptômes/ Réfugié

- (4) Contacts/ Réfugié
  - (5)

Autres (6)

1. **Symptômes (choix multiples possibles)**

Si oui, durée de la toux?:  (jours)

Fièvre > 38°C  (0)  (1) ……… Si oui, durée de la fièvre?:  (jours) Pas de prise pondérale  (0)  (1)

| Pas de symptôme | Non   - (0) | Oui   - (1) |
| --- | --- | --- |
| Toux | - (0) | - (1) ……… |
| « Wheezing » (respiration sifflante) | - (0) | - (1) |

Perte de poids  (0)  (1)

Autres symptômes  (0)  (1) ……… Si oui, lesquels : ………………………………

1. **Diagnostic par imagerie radiologique (choix multiples possibles)**

Radio du thorax Fait  (1) Pas fait  (0)

Face  (0) Date :  /  / 

(JJ/MM/AAAA)

Profil  (1) Date :  /  / 

(JJ/MM/AAAA)

Non Oui

Compression trachée/bronches  (0)  (1)

Lymphadénopathie hilaire  (0)  (1) Consolidation du parenchyme  (0)  (1) Image miliaire  (0)  (1)

Epanchement pleural  (0)  (1)

Caverne  (0)  (1)

CT du thorax ……………………. Fait  (1) Date :  /  / 

(JJ/MM/AAAA)

CT cérébral ……………………. Fait  (1) Date :  /  / 

(JJ/MM/AAAA)

MRI cérébrale ……………………. Fait  (1) Date :  /  / 

(JJ/MM/AAAA)

Sonographie ……………………. Fait  (1) Date :  /  / 

(JJ/MM/AAAA)

Localisation : …………………………………….

Autre ……………………. Fait  (1) Date :  /  / 

(JJ/MM/AAAA)

Localisation : ……………………………………..

Pas fait  (0) Pas fait  (0) Pas fait  (0) Pas fait  (0)

Pas fait  (0)

1. **Immunodiagnostic (choix multiples possibles)**

Test du Mantoux Non  (0) Oui  (1) Date :  /  /  (JJ/MM/AAAA)

Résultat:  (mm)

T.SPOT-TB® Non  (0) Oui  (1) Date :  /  /  (JJ/MM/AAAA)

Résultat : Négatif  (0) Positif  (1) Incertain  (2)

Nil . (Spots) ESAT-6 . (Spots) CFP-10 . (Spots) PHA . (Spots)

Interprétation: Négatif  (0)

Positif  (1)

Non spécifié  (2)

QuantiFERON-TB Gold®

Non  (0) Oui  (1)

Date :  /  /  (JJ/MM/AAAA) Résultat: Négatif  (0) Positif  (1) Incertain  (2)

Nil . (IU/ml)

TB-Ag1 . (IU/ml) TB-Ag2 . (IU/ml) PHA . (IU/ml)

Interprétation: Négatif  (0)

Positif  (1)

Non spécifié  (2)

Autres Non  (0) Oui  (1) Si oui, lesquels : ………………………………

1. **Diagnostic microbiologique (choix multiples possibles)**

|  | Pas fait | Fait | Culture positive | Culture négative | PCR  positive | PCR  négative |
| --- | --- | --- | --- | --- | --- | --- |
| Expectorations | - (0) | - (1) | - (2) | - (3) | - (4) | - (5) |
| Liquide de tubage gastrique | - (0) | - (1) | - (2) | - (3) | - (4) | - (5) |
| Lavage broncho alvéolaire | - (0) | - (1) | - (2) | - (3) | - (4) | - (5) |
| Expectorations induites | - (0) | - (1) | - (2) | - (3) | - (4) | - (5) |
| Hémoculture | - (0) | - (1) | - (2) | - (3) | - (4) | - (5) |
| Ponction lombaire | - (0) | - (1) | - (2) | - (3) | - (4) | - (5) |
| Biopsie (donnez la localisation) | - (0)  (1)  (2) | | | - (3) | - (4) | - (5) |
| Localisation :  Autre liquide (donnez la localisation) | ………………………………………   - (0)  (1)  (2) | | | - (3) | - (4) | - (5) |

Localisation : ……………………………………..

Type de mycobactérie : ……………………………………………………………………………………

1. **Antibiogramme et thérapie (choix multiples possibles)**

**Résistance Thérapie donnée Dose**

|  | Non | Oui | Incertain | Non | Oui |
| --- | --- | --- | --- | --- | --- |
| Isoniazide | - (0) | - (1) | - (2) | - (0) | - (1) |
| Rifampicine | - (0) | - (1) | - (2) | - (0) | - (1) |
| Pyrazinamide | - (0) | - (1) | - (2) | - (0) | - (1) |
| Ethambutole | - (0) | - (1) | - (2) | - (0) | - (1) |
| Corticostéroïde | ………………………………………… | | | - (0) | - (1) |

. (mg/kg/jour)

. (mg/kg/jour)

. (mg/kg/jour)

. (mg/kg/jour)

. (mg/kg/jour) Autre thérapie : ………………………………………………………………………………………………

1. **Source suspectée de l’infection**

| Père  (0)  Frère  (6) | Mère  (1)  Sœur  (7) | Inconnu  (2)  Oncle  (8) | Cousin (3)  Ecole  (9) | Grand-père  (4)  Centre d’asile  (10) | Grand-mère  (5)  Belle-mère  (11) |
| --- | --- | --- | --- | --- | --- |
| Tante  (12) | Contacts (13) |  |  |  |  |
| Autre  (14) | Précisez : ……………………………………………………………. | | | | |

1. **Centre hôspitalier /contact**

Hôpital : ……………………………

Nom du Médecin traitant: ………………………………………………………………

Numéro de téléphone du médecin:    

**Un grand merci pour votre précieuse collaboration**

**S’il vous plaît renvoyez le formulaire à :**

**Dr méd. Nicole Ritz, Universitäts-Kinderspital beider Basel (UKBB), Spitalstrasse 33, 4031 Basel.**

Si vous ne connaissez pas toutes les informations, envoyez-nous le formulaire, même incomplet !
